# Supplementary material
Source: PubMed Central journal article supplement (PMC2667954)
Supplement: NIHMS106538-supplement-1.pdf [file NIHMS106538-supplement-1.pdf]

## Supplementary Materials for

### **Obesity Increases Vascular Senescence and Susceptibility to Ischemic Injury Through Chronic Activation of Akt and mTOR**

Chao-Yung Wang, Hyung-Hwan Kim, Yukio Hiroi, Naoki Sawada, Salvatore Salomone, Laura E. Benjamin, Kenneth Walsh, Michael A. Moskowitz, James K. Liao\*

\*To whom correspondence should be addressed. E-mail: [jliao@rics.bwh.harvard.edu](mailto:jliao@rics.bwh.harvard.edu)

Published 17 March 2009, *Sci. Signal.* **2**, ra11 (2009)

DOI: 10.1126/scisignal.2000143

#### **This PDF file includes:**

Fig. S1. Increased Akt and mTOR activation following a high-fat diet.

Fig. S2. Endothelial mitochondrial membrane potential.

# Figure S1

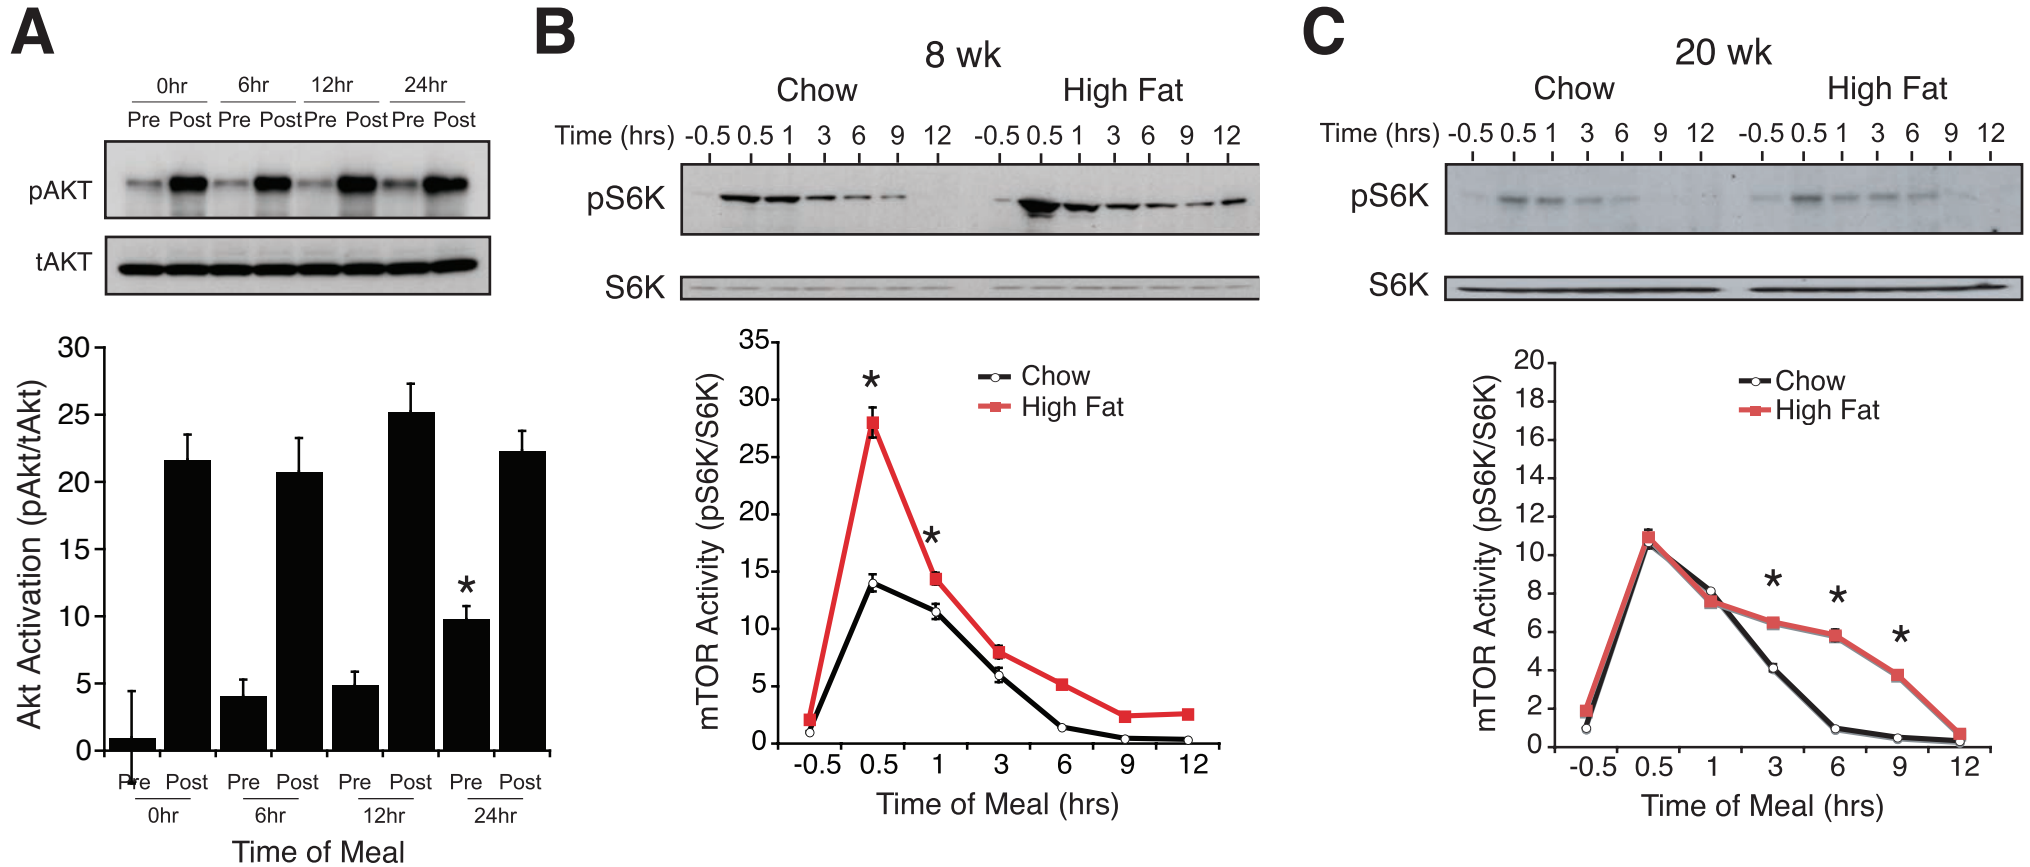

**Fig. S1. Increased Akt and mTOR activation following high-fat diet.**

(A) Akt is activated to a greater extent after each high-fat diet meal. Aortic tissues were isolated from mice trained to receive 3 high-fat diet meals a day at 0, 6 or 12 hours. Akt phosphorylation was determined before (Pre) or after (Post) each meal. Each group contained 3 mice. \* $P < 0.05$  when compared to value at 0 hr. (B&C) Immunoblots showing time-dependent effects of high fat or chow diet on S6K phosphorylation and pS6K/S6K ratio following feeding at 8 and 20 weeks. \* $P < 0.05$  when compared to chow diet. Densitometric analyses of the ratio for each blot are shown in the bottom panels. Results are presented as mean  $\pm$  SD. Each lane represents one or two mice. Each experiment was performed three times.

# Figure S2

## A

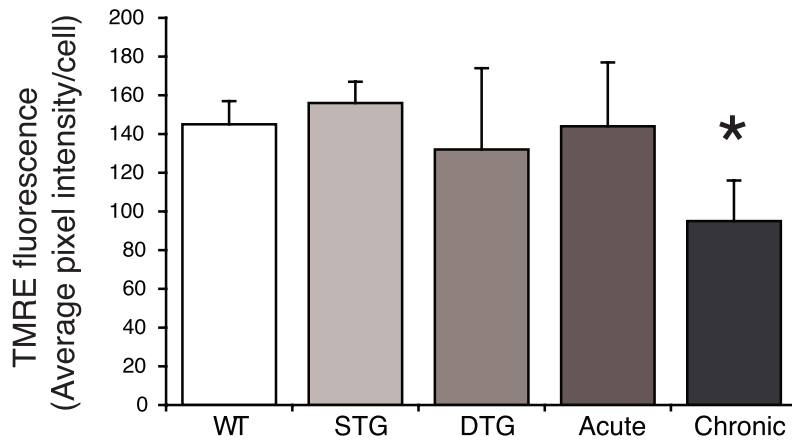

## B

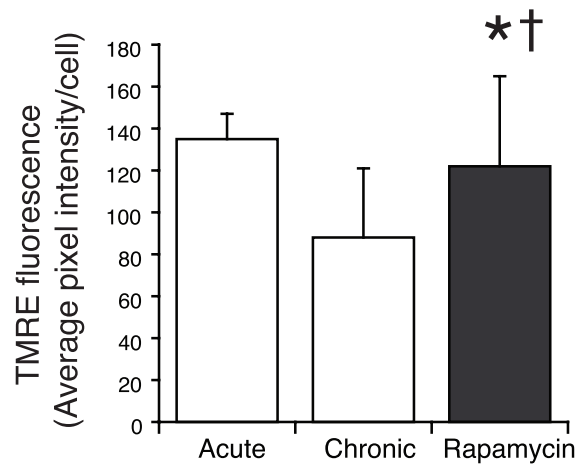

## C

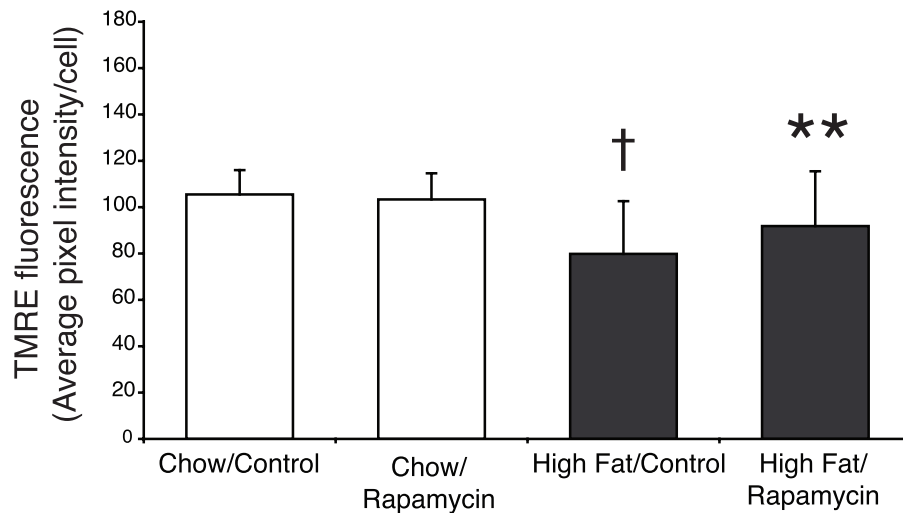

### Fig. S2. Endothelial mitochondrial membrane potential.

Mitochondrial membrane potentials were analyzed in aortic endothelial cells from (A) WT, wild-type; STG, single transgenic mice (tet-myrAkt); DTG, double transgenic mice (VE-cadherin-tTA/tet-myrAkt) without induction and with short-term (ST) or long-term (LT) Akt induction. (\* $P < 0.05$  when compared to DTG and DTG-ST), (B) Double mutant Akt mice (DTG) with short-term (DTG-ST) or long-term Akt activation with vehicle (DTG-LT) or rapamycin (DTG-LT/Rapa) treatment (\* $P < 0.05$  when compared to DTG-LT, † $P = 0.23$  when compared to DTG-ST) and (C) Chow diet or High fat diet fed mice receiving rapamycin or vehicle (control) treatment (\*\* $P < 0.05$  when compared to high fat fed group without rapamycin; † $P = 0.017$  when compared to chow diet fed group). Experiments were performed three times using the fluorescence probe, tetramethylrhodamine ethyl ester (TMRE, Molecular probes).
